# Supplementary material for: Identification of spikes in continuous ground-based in-situ time series of CO 2 , CH 4 and CO: an extended experiment within the European ICOS-Atmosphere Network
Source: Copernicus journal article supplement (doi:10.5194/amt-2023-130), 2023-07-03
Supplement: Supplementary file 1 [file amt-2023-130-supplement.zip]

# Identification of spikes in continuous ground-based in-situ time series of CO<sub>2</sub>, CH<sub>4</sub> and CO: an extended experiment within the European ICOS-Atmosphere Network

P. Cristofanelli<sup>1</sup>, C. Fratticioli<sup>1</sup>, L. Hazan<sup>2</sup>, M. Chariot<sup>2</sup>, C. Couret<sup>3</sup>, O. Gazetas<sup>4</sup>, D. Kubistin<sup>5</sup>, A. Laitinen<sup>6</sup>, A. Leskinen<sup>7,8</sup>, T. Laurila<sup>6</sup>, M. Lindauer<sup>5</sup>, G. Manca<sup>9</sup>, M. Ramonet<sup>3</sup>, P. Trisolino<sup>1</sup>, M. Steinbacher<sup>10</sup>

<sup>1</sup>Institute of Atmospheric Science and Climate - National Research Council of Italy, Bologna I-40129, Italy

<sup>2</sup>Laboratoire des Sciences du Climat et de l'Environnement, Université Paris-Saclay, 91190 Saint-Aubin, France

<sup>3</sup>German Environment Agency UBA, 82475, Germany

<sup>4</sup>Scottish Universities Environmental Research Centre, Glasgow G75 0QF, United Kingdom

<sup>5</sup>Deutscher Wetterdienst, Hohenpeißenberg Meteorological Observatory, 82383 Hohenpeissenberg, Germany

<sup>6</sup>Finnish Meteorological Institute, Helsinki 00560, Finland

<sup>7</sup>Department of Technical Physics, University of Eastern Finland, FI-70210 Kuopio, Finland

<sup>8</sup>Finnish Meteorological Institute, FI-70210 Kuopio, Finland

<sup>9</sup>Joint Research Centre, Ispra I- 21027, Italy

<sup>10</sup>Swiss Federal Laboratories for Materials Science and Technology Empa, Duebendorf CH-8600, Switzerland

*Correspondence to:* P. Cristofanelli (p.cristofanelli@isac.cnr.it)

*Supplementary Material*

For REBS a test was carried out by increasing to 10 days and to 30 days the temporal window over which the baseline  $\hat{g}(t_i)$  was calculated. The test was carried out by using  $\beta = 3$  for 8 sites (CMN, JFJ, UTO, IPR, KIT, PUI, SAC, JUS). As descriptive examples, here we reported two case studies for SAC.

The following plot (slide 3) reports  $\text{CO}_2$  (17-29 March 2019, left) and  $\text{CH}_4$  (9-10 January 2019, right) for SAC. Black data points are the retained measurements; red points represent the data flagged as spikes using REBS methods. Different time windows (1 day, 10 days and 30 days) were applied in the algorithm for the calculation of the baseline.

CO<sub>2</sub>-SAC-329 - h. 100.0 - event: 17/03/2019-29/03/2019 REBS beta = 3

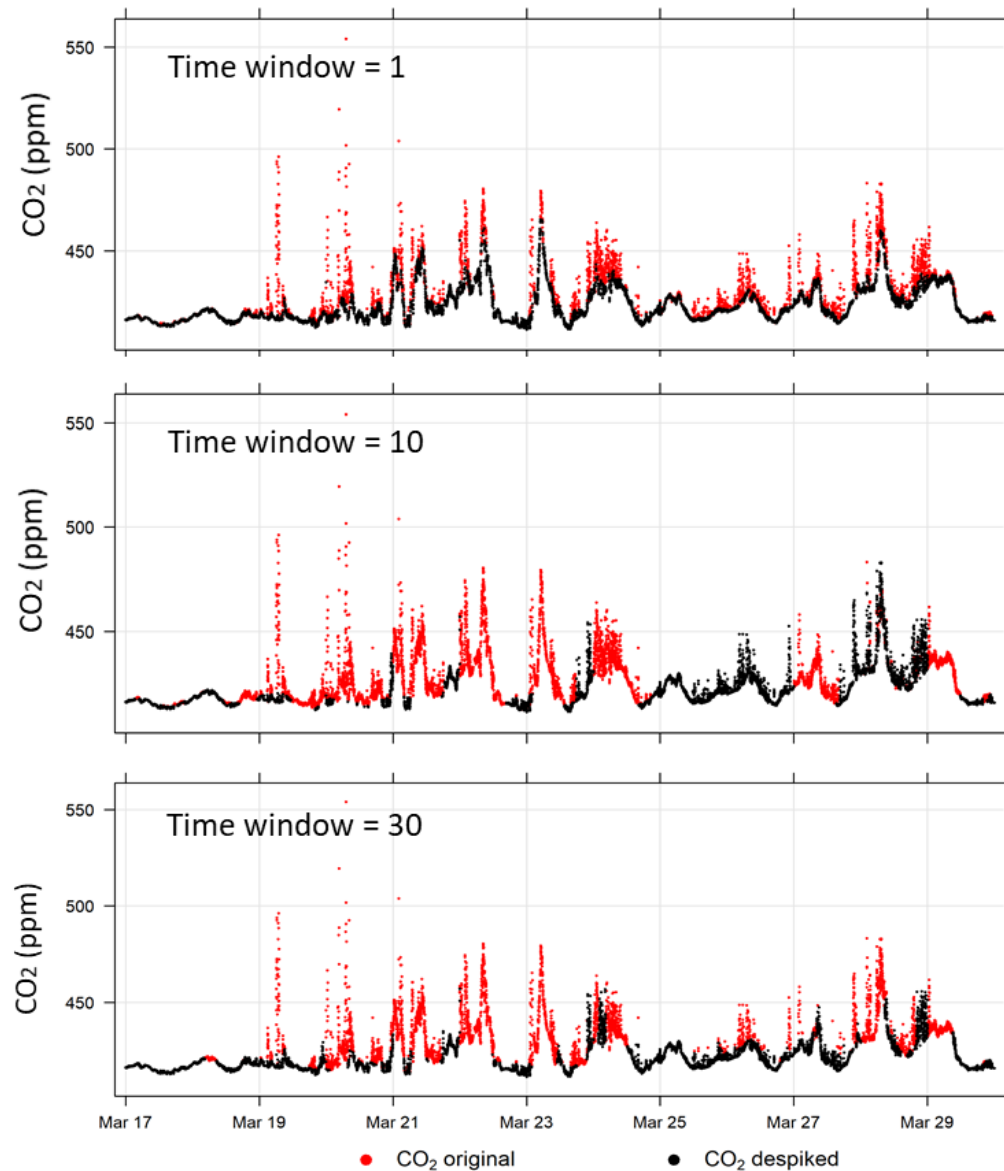

CH<sub>4</sub>-SAC-329 - h. 100.0 - event: 09/01/2019-10/01/2019 REBS beta = 3

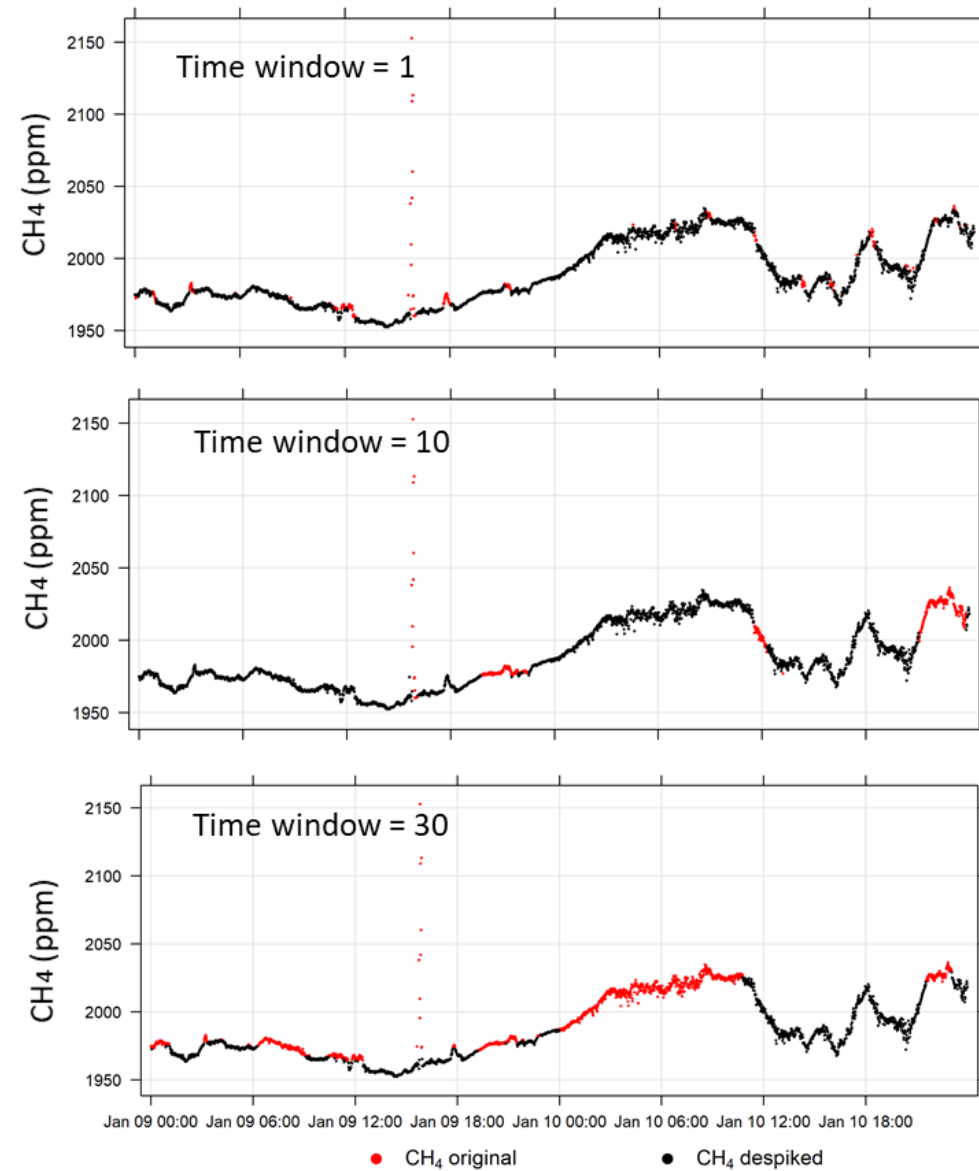

REBS (with  $\beta = 3$ ) was run on the time series of the 1-minute  $\text{CH}_4$  standard deviations (instead of on the 1-minute mean averaged values). The aim of this test was to assess the ability of REBS in detecting data characterized by high internal variability at time scales lower than 1 minute.

In the following plots (slides 3 - 10), for each site, we reported examples of the comparison between the results of the REBS application in the standard configuration (left) and by using the 1-minute standard deviation values (right).

For each plot, black points are the retained measurements; red points represent the data flagged as spikes. The dates of the event occurrences were reported in the plot title. The time reported in the x-axis is expressed as decimal dates.

# Ispra(IPR)

REBS\_MR-9/7/2020

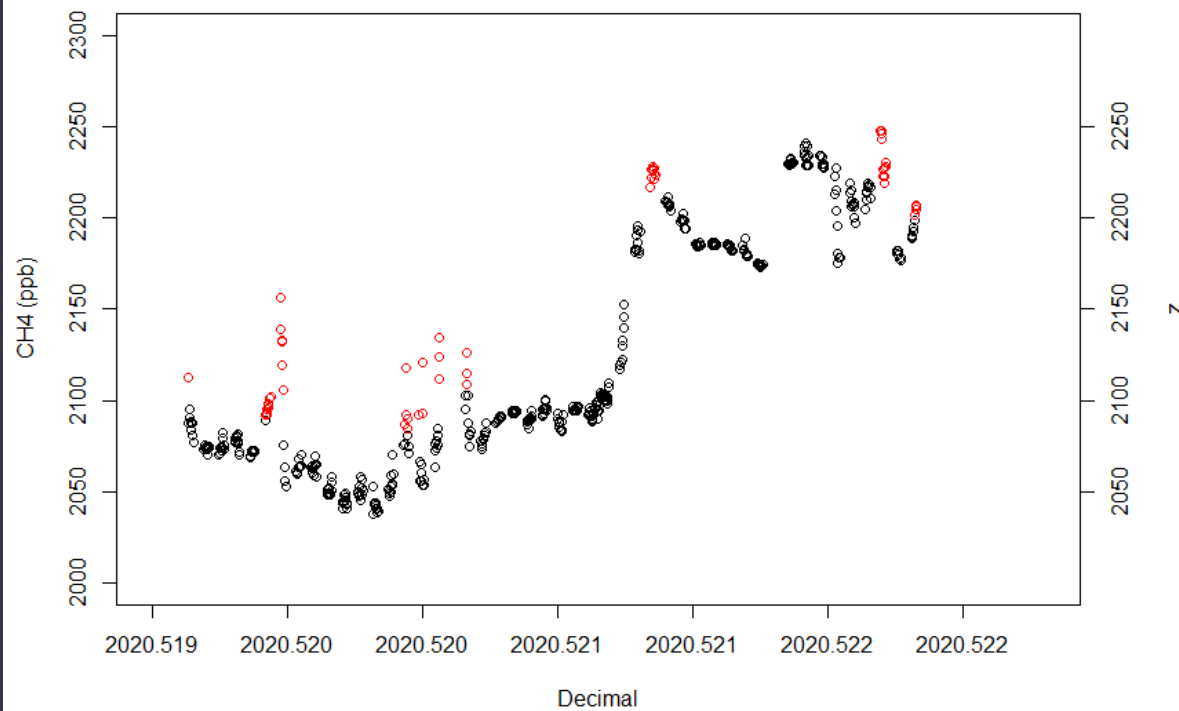

REBS\_StDev-9/7/2020

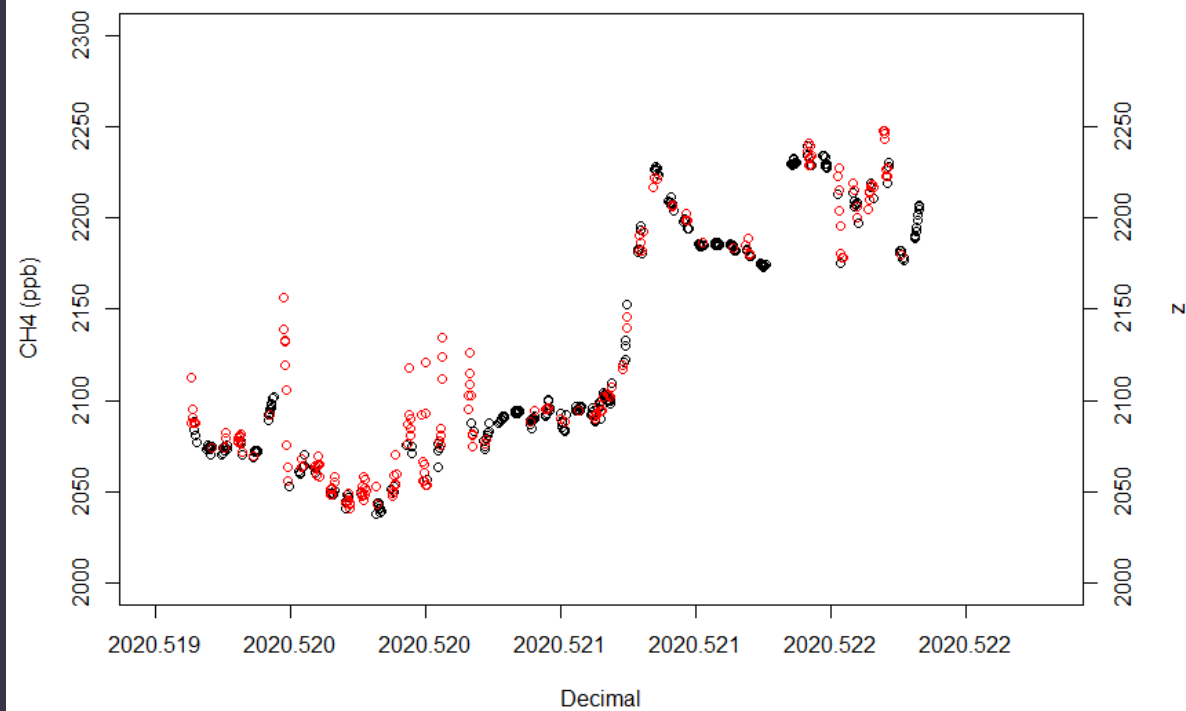

○ No spikes    ○ Spikes

# Jungfrauoch (JFJ)

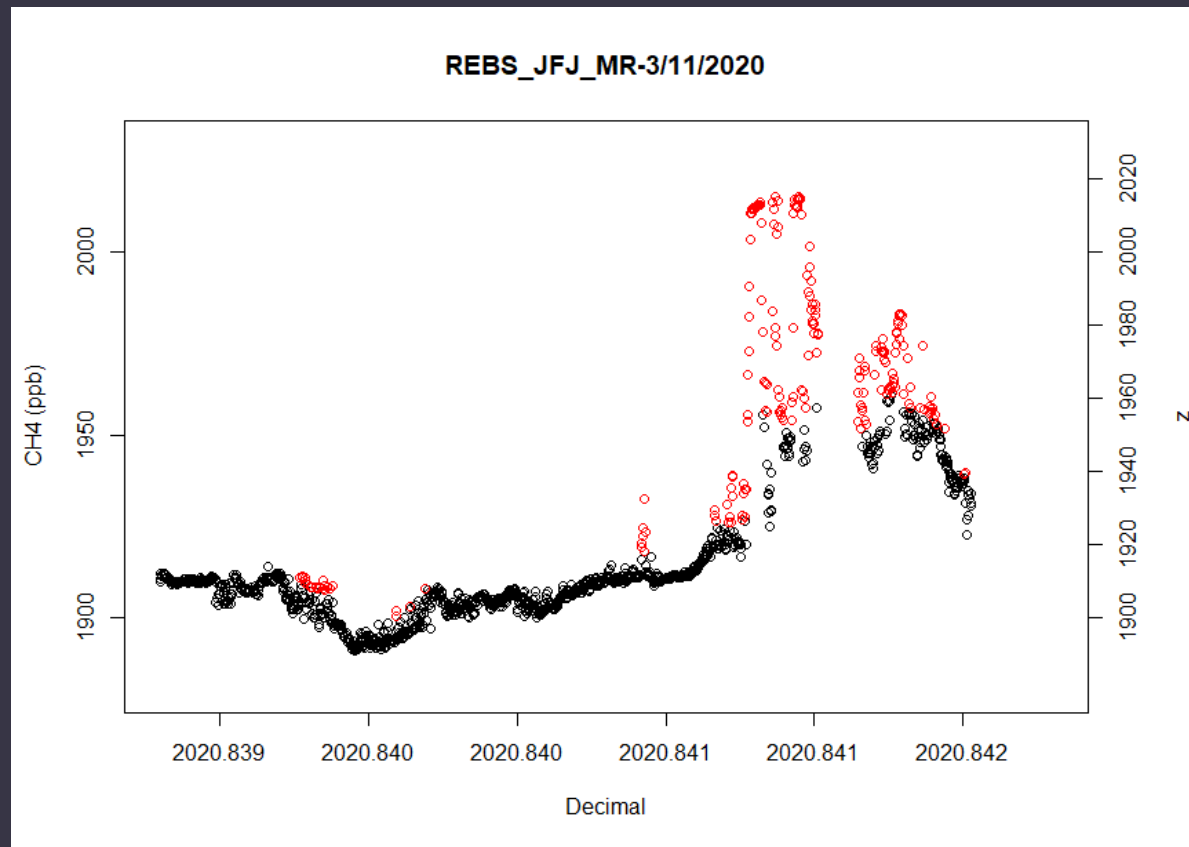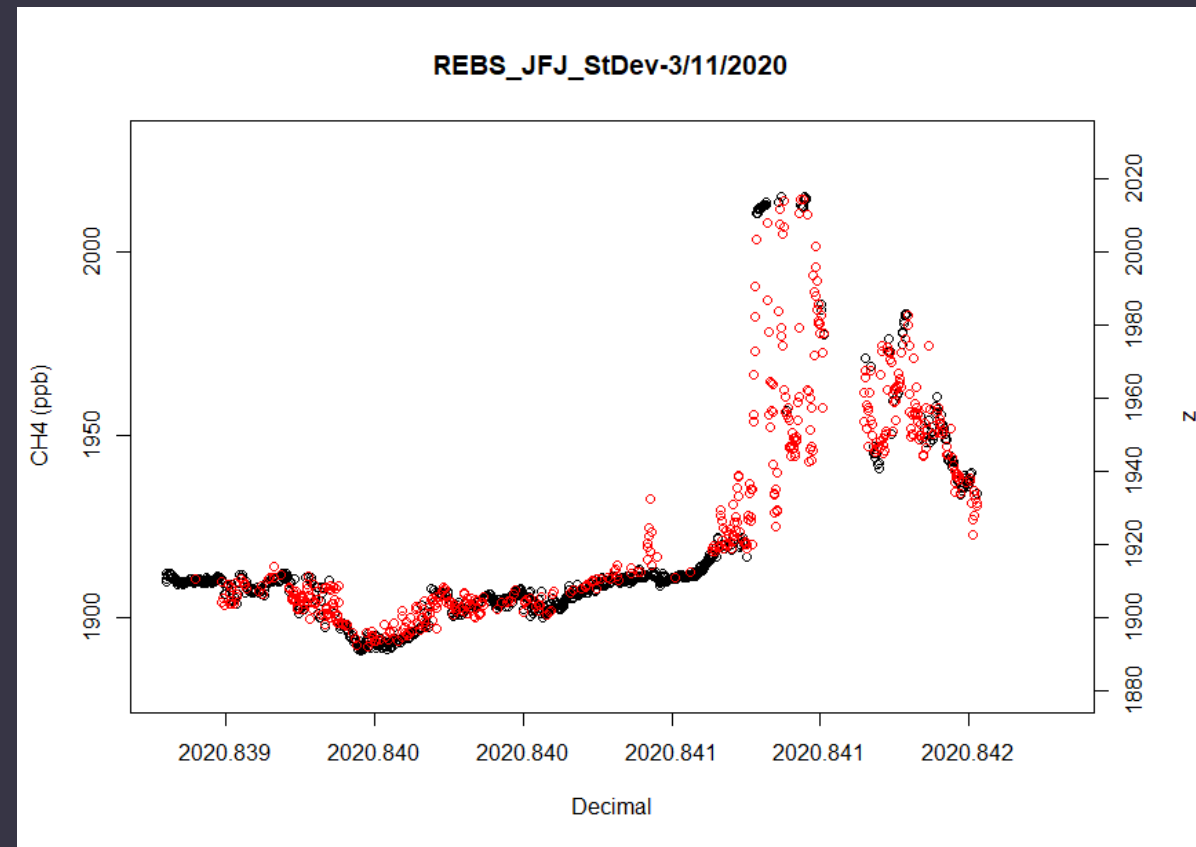

○ No spikes    ○ Spikes

# Puijo (PUI)

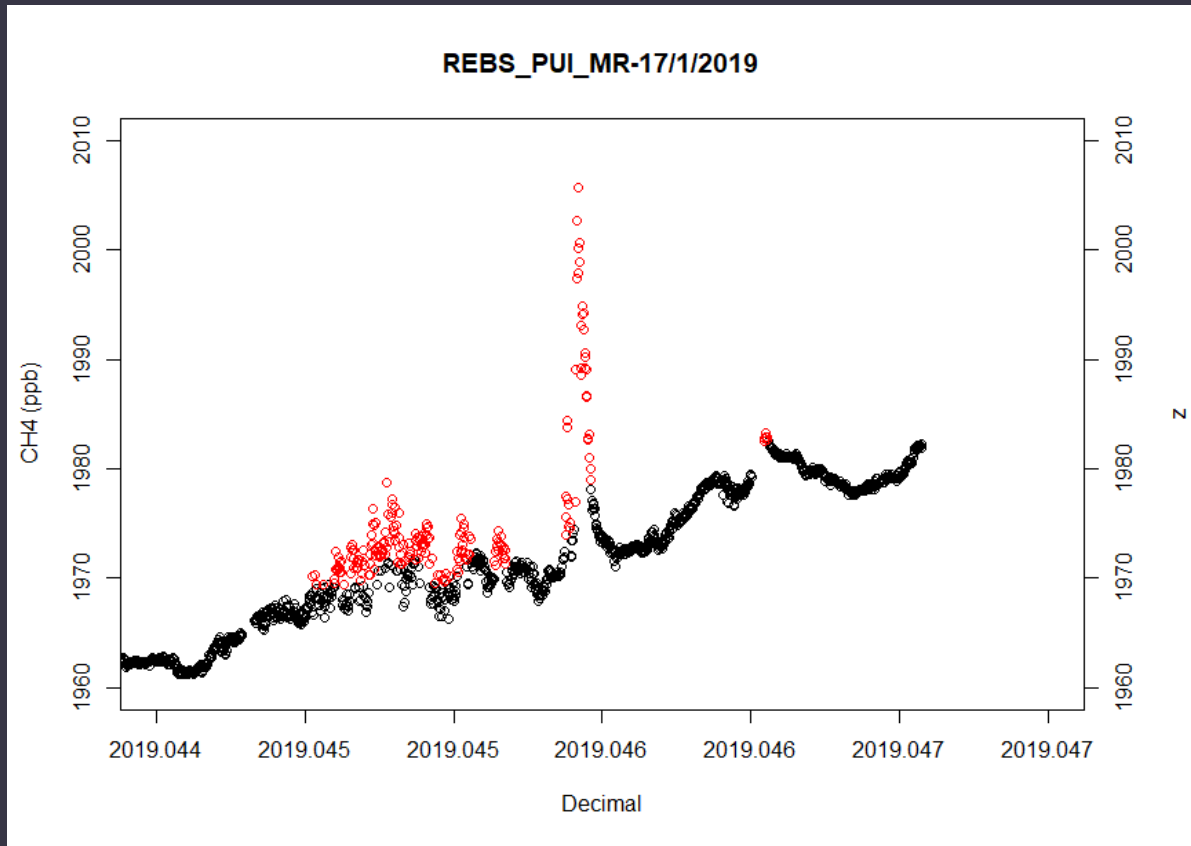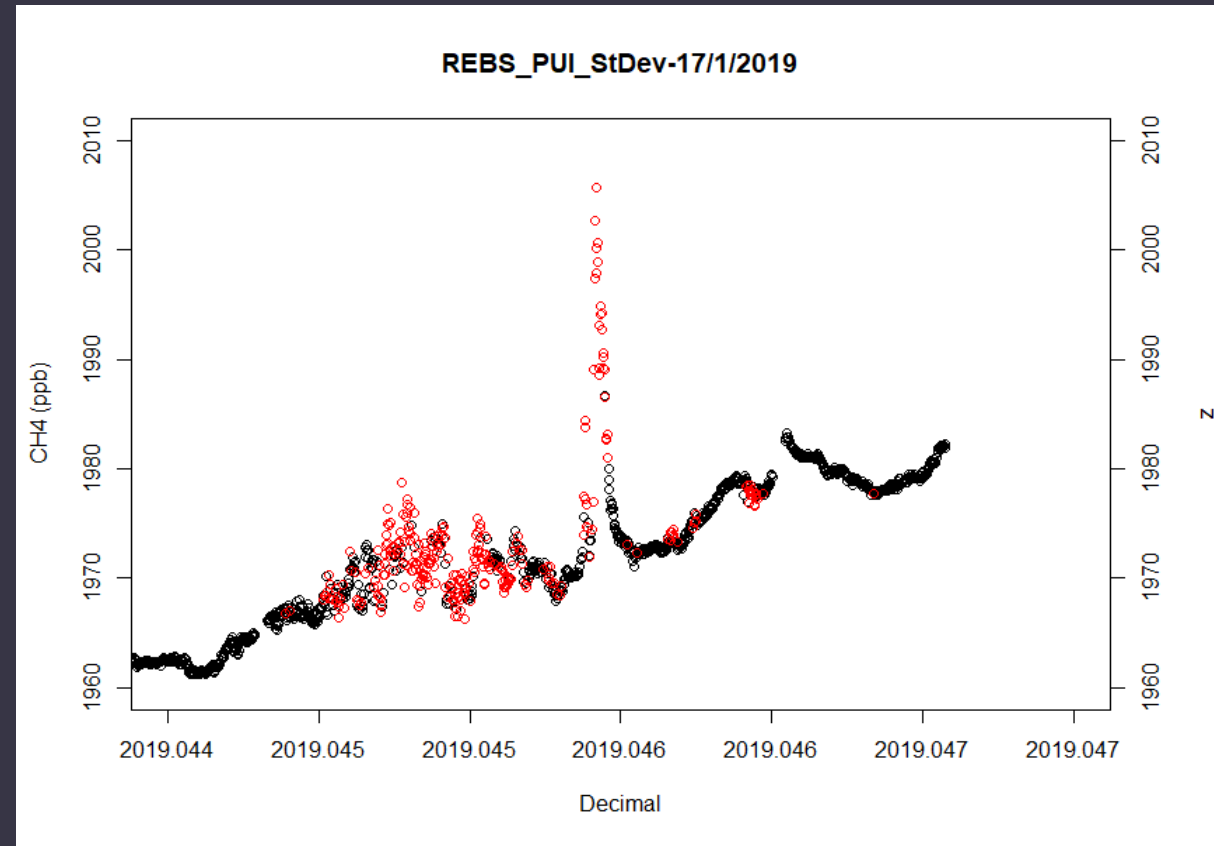

○ No spikes    ○ Spikes

# Saclay (SAC)

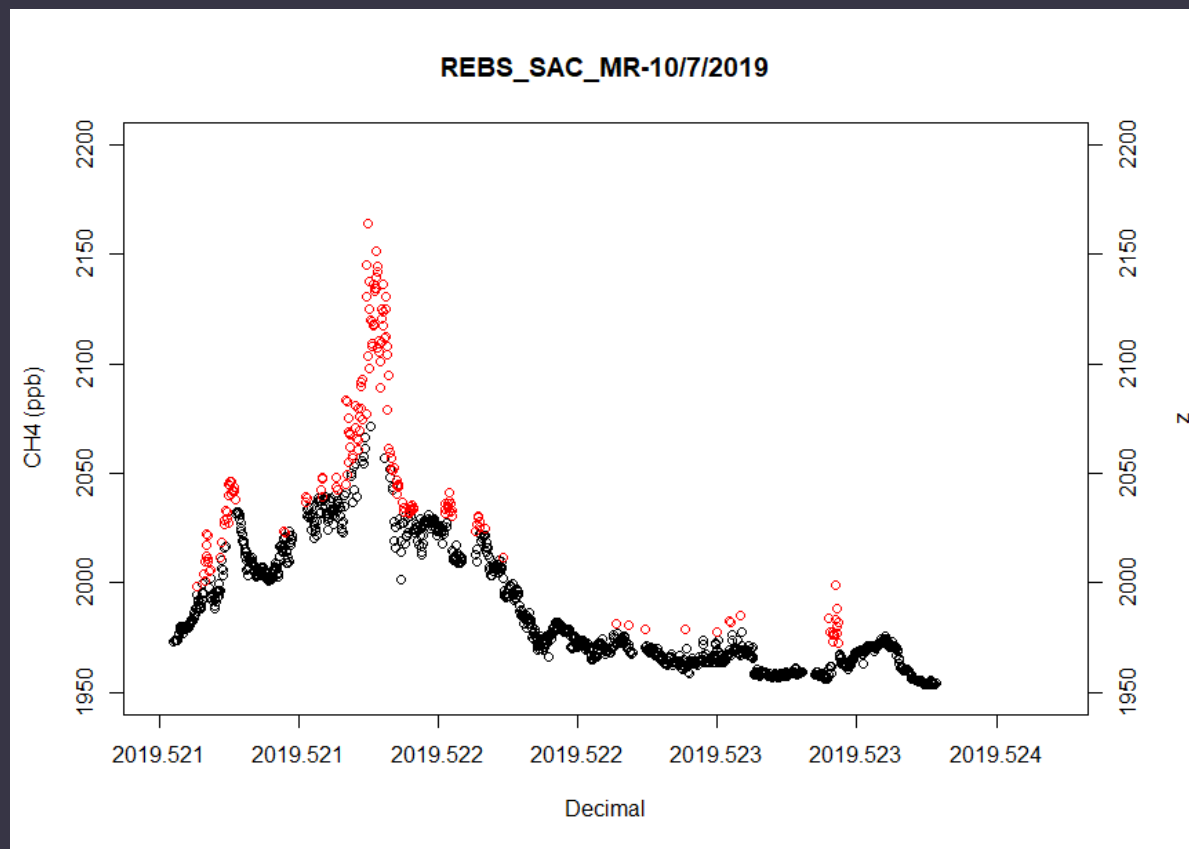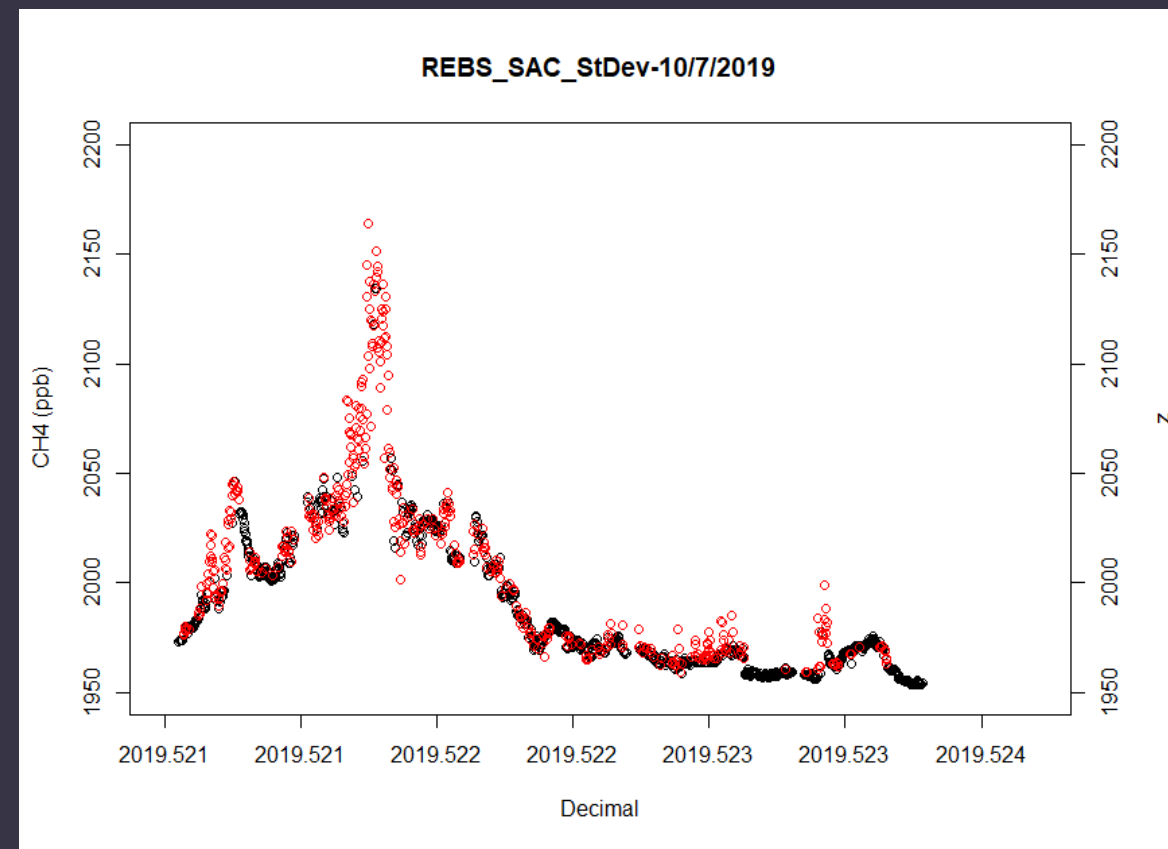

○ No spikes    ○ Spikes



# Karlsruhe (KIT)

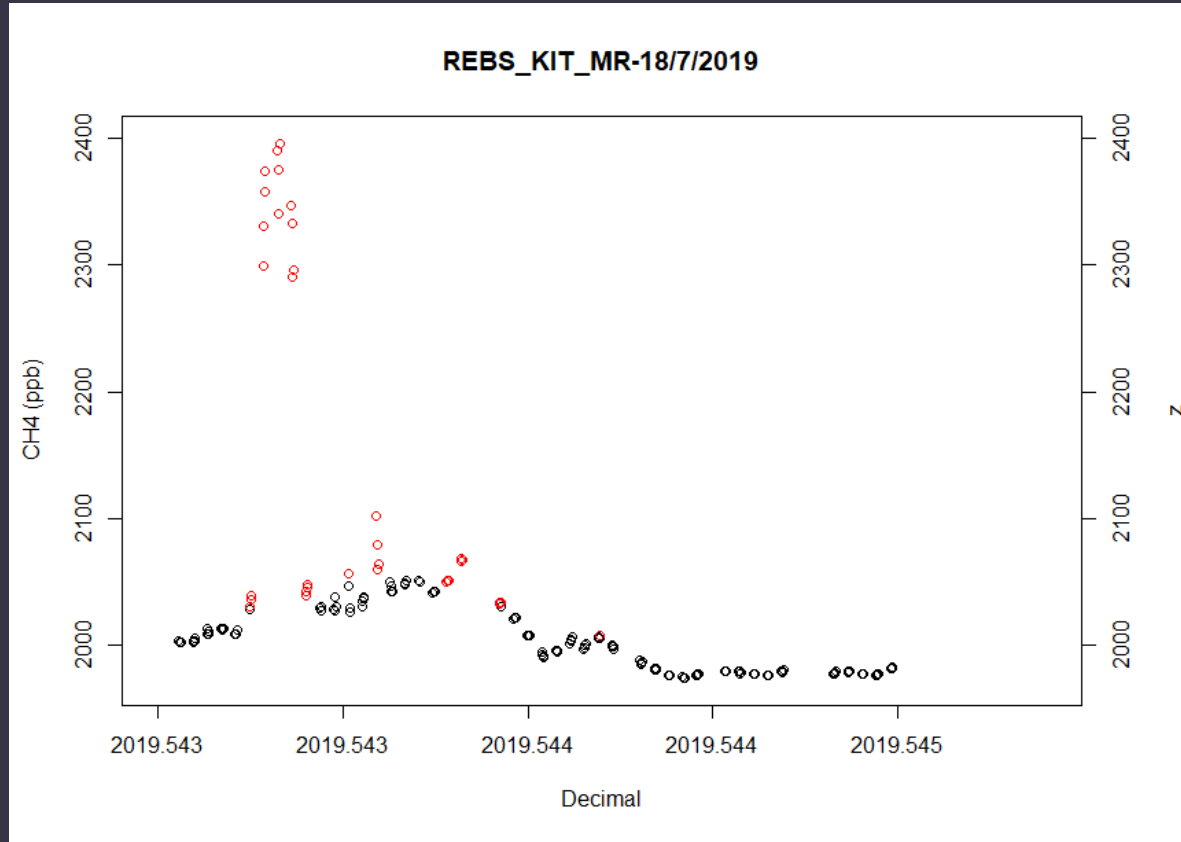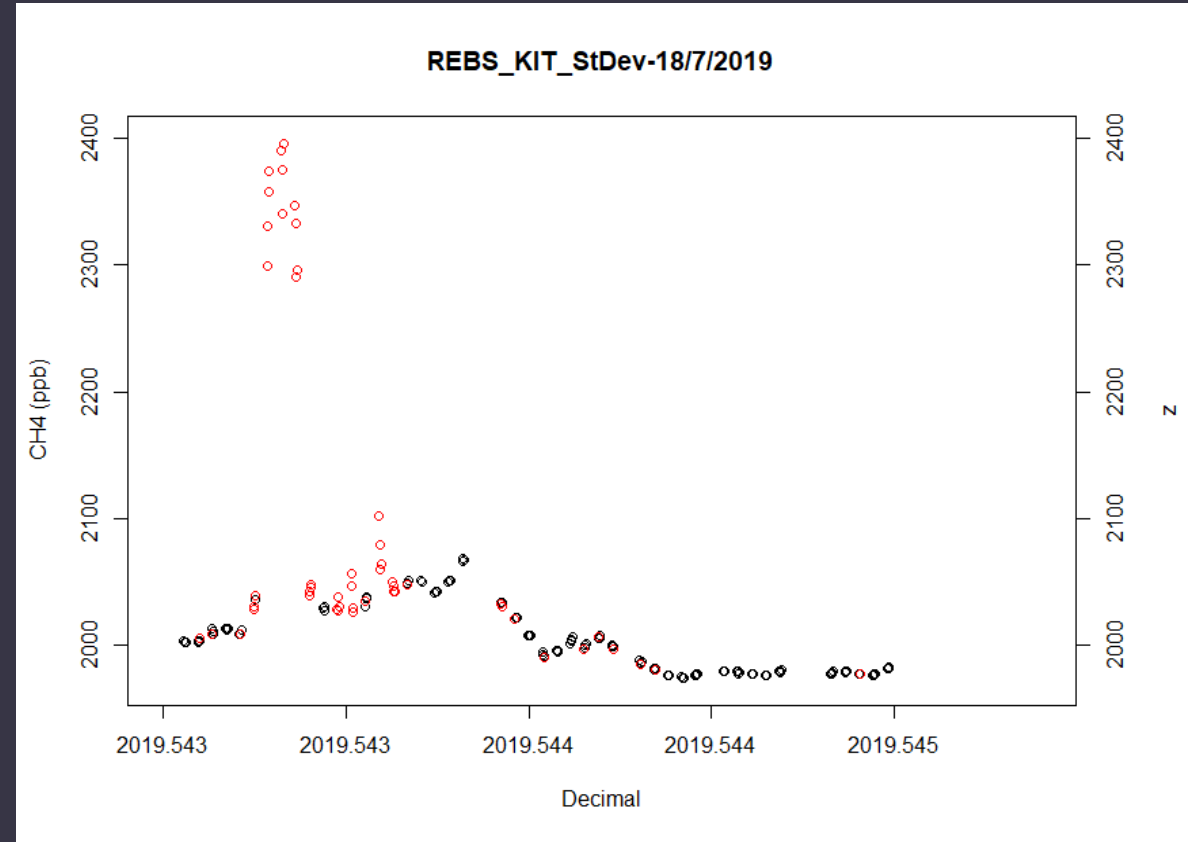

○ No spikes    ○ Spikes

# Monte Cimone (CMN)

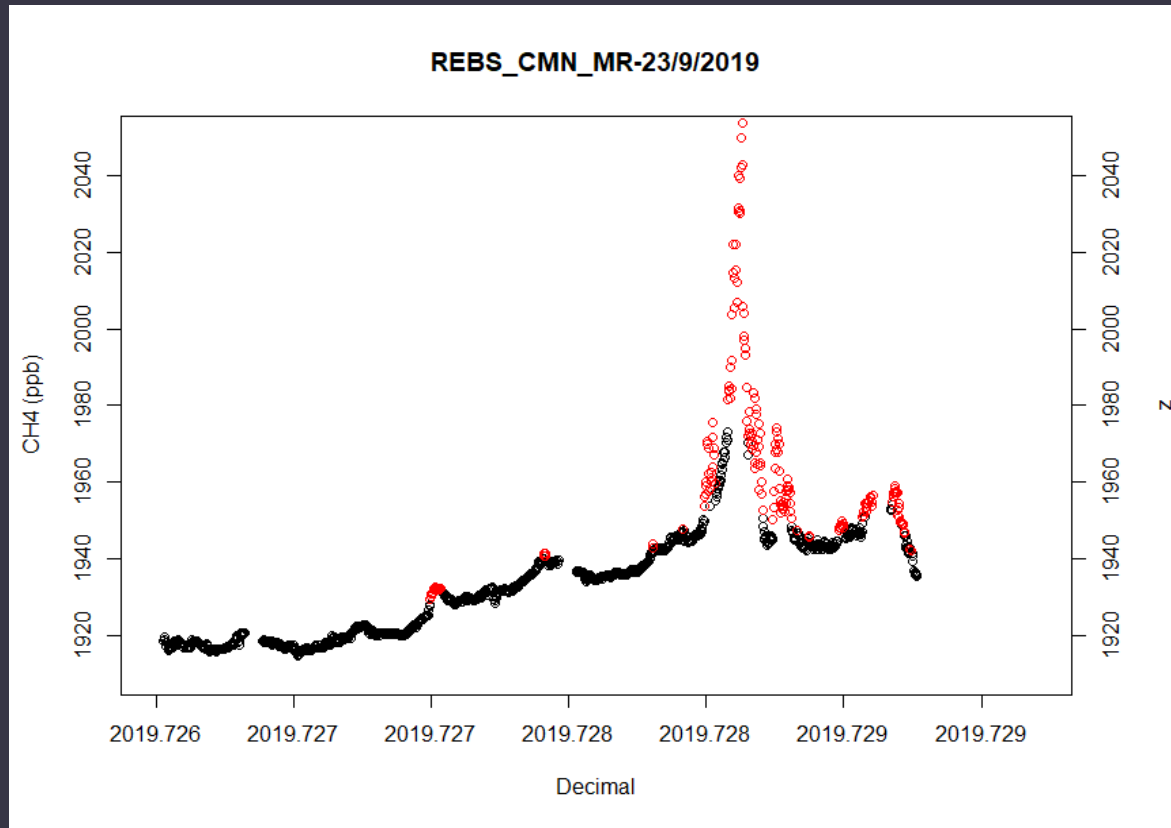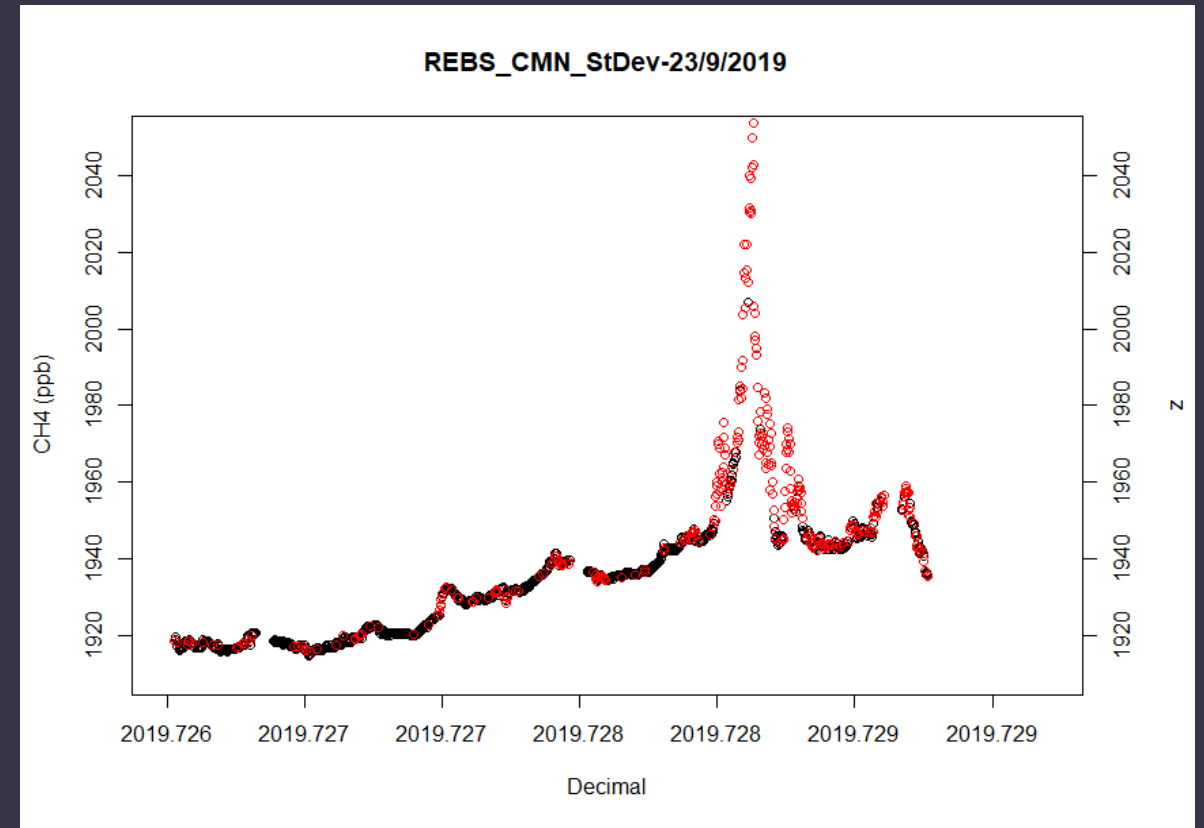

○ No spikes    ○ Spikes

# Utö (UTO)

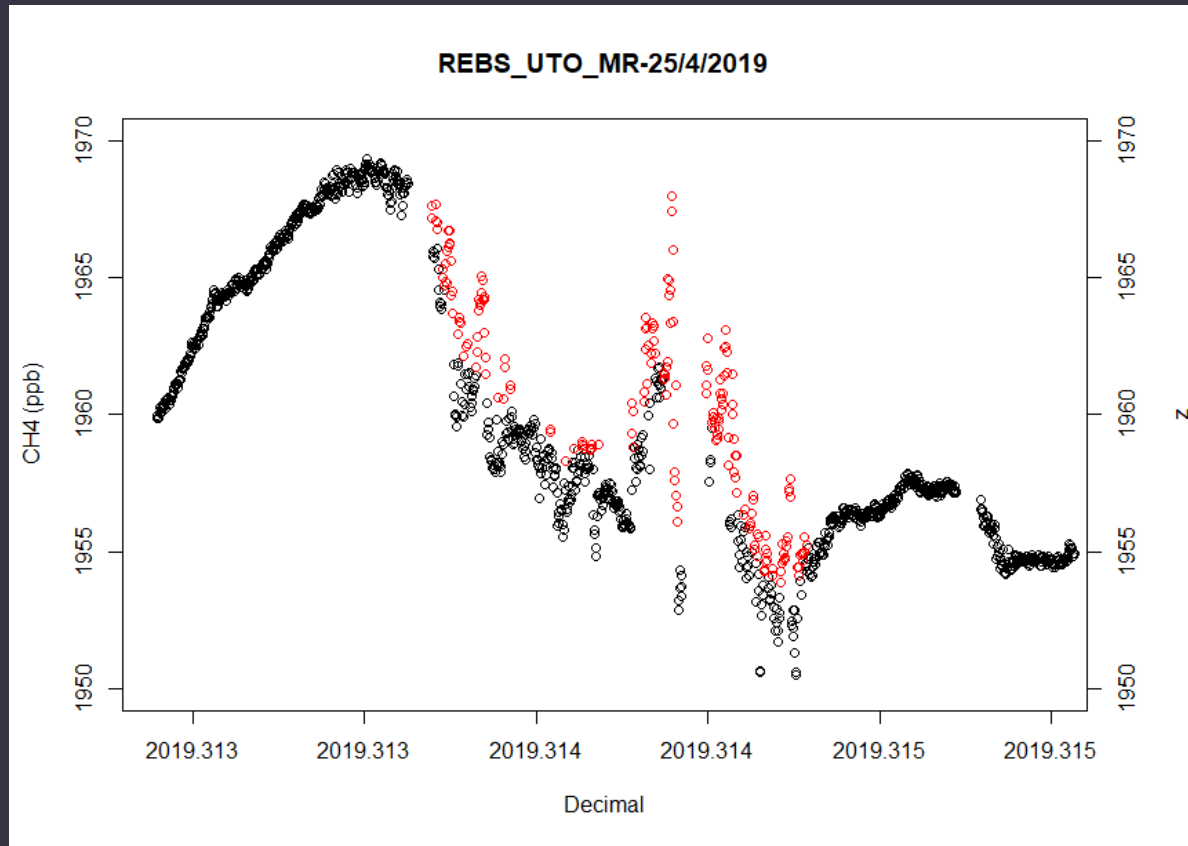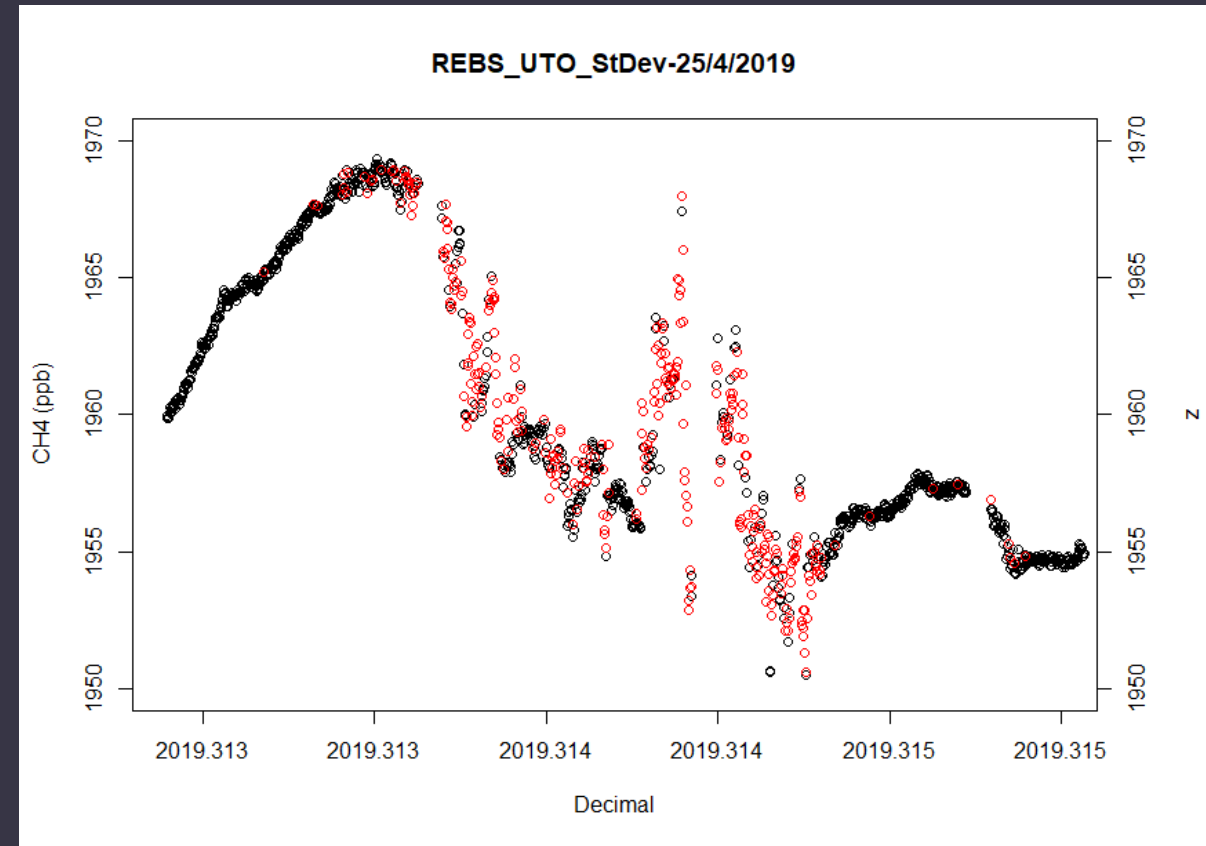

○ No spikes    ○ Spikes

# Jussieu (JUS)

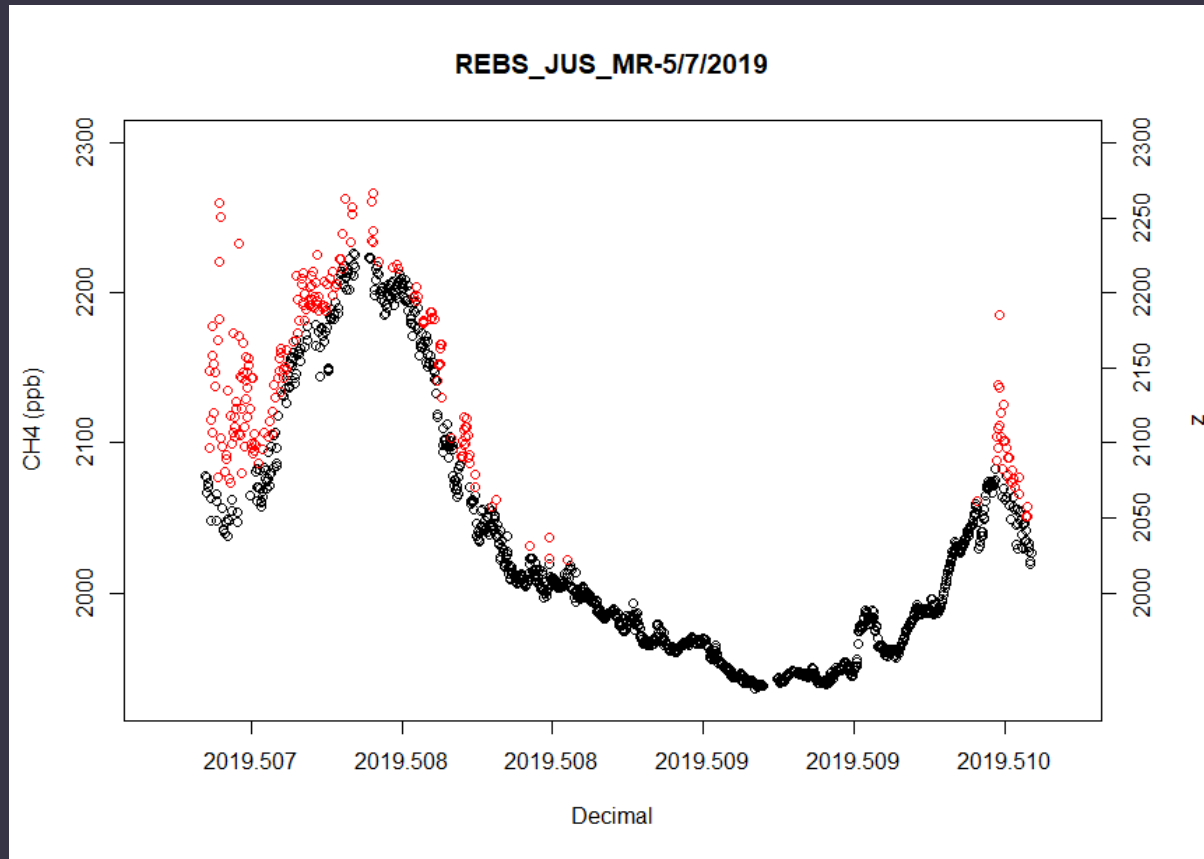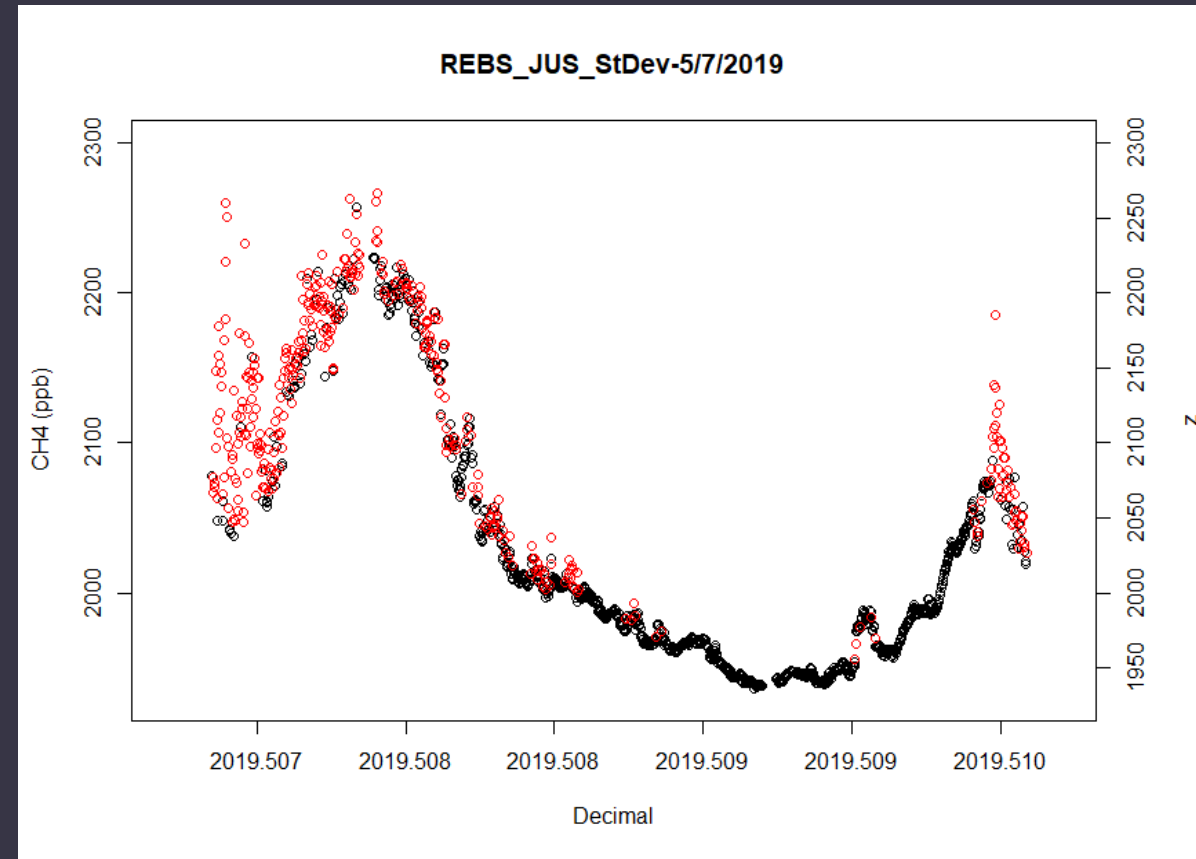

○ No spikes    ○ Spikes
