# Supplementary material for: Identification of spikes in continuous ground-based in-situ time series of CO 2 , CH 4 and CO: an extended experiment within the European ICOS-Atmosphere Network
Source: Copernicus journal article supplement (doi:10.5194/amt-2023-130), 2023-07-03
Supplement: Supplementary file 3 [file amt-2023-130-supplement.zip]

Archive with 2 entries (2 files):
- Cristofanellietal_amtd_icos_spikes_SM1.pdf
- Cristofanellietal_amtd_icos_spikes_SM2.pdf
