# Supplementary material for: Identification of spikes in continuous ground-based in-situ time series of CO 2 , CH 4 and CO: an extended experiment within the European ICOS-Atmosphere Network
Source: Copernicus journal article supplement (doi:10.5194/amt-2023-130), 2023-07-03
Supplement: Supplementary file [file amt-2023-130-AC4-supplement.pdf]

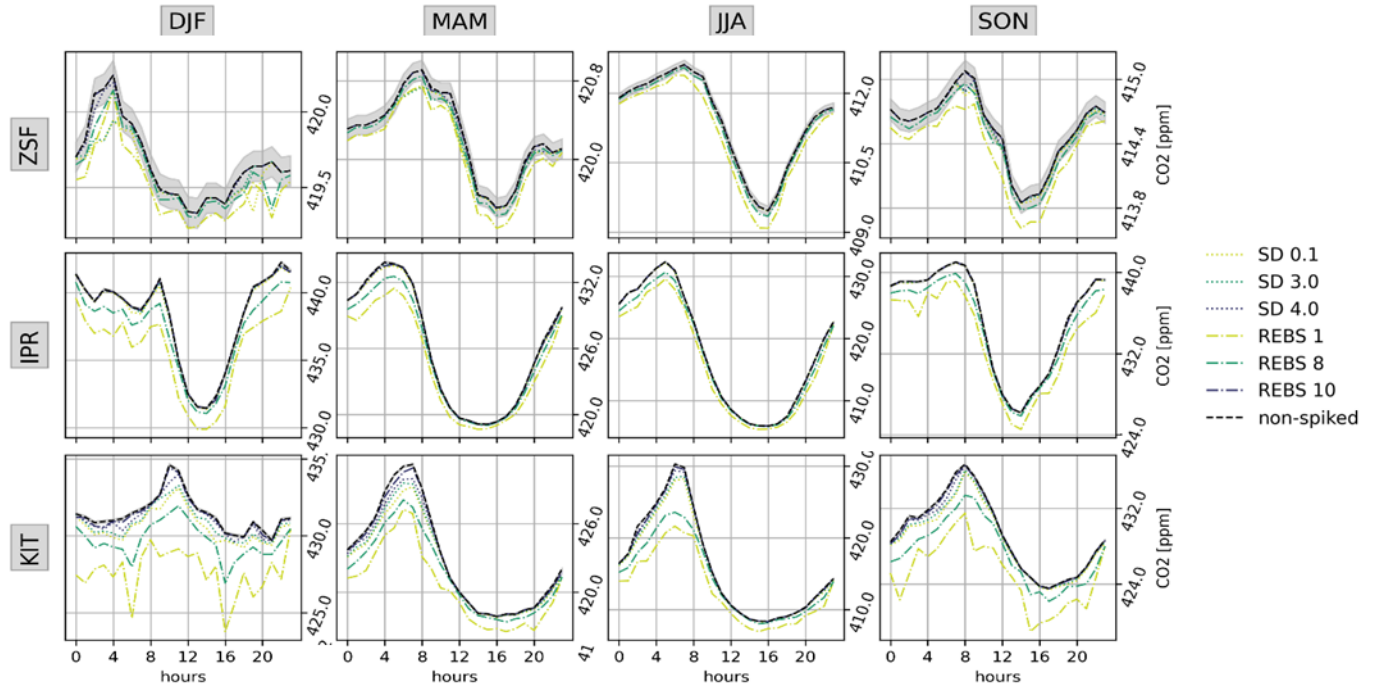

**Figure 8: Mean seasonal diurnal cycles of CO<sub>2</sub> for different data selection and sampling heights at ZSF, IPR and KIT: results for the original data are shown (“non-spiked”) together with those after de-spiking for SD with  $\alpha = (0.1, 1, 4)$  and REBS with  $\beta = (1, 3, 10)$ . The grey areas indicate the WMO network compatibility goal referred to the original dataset.**

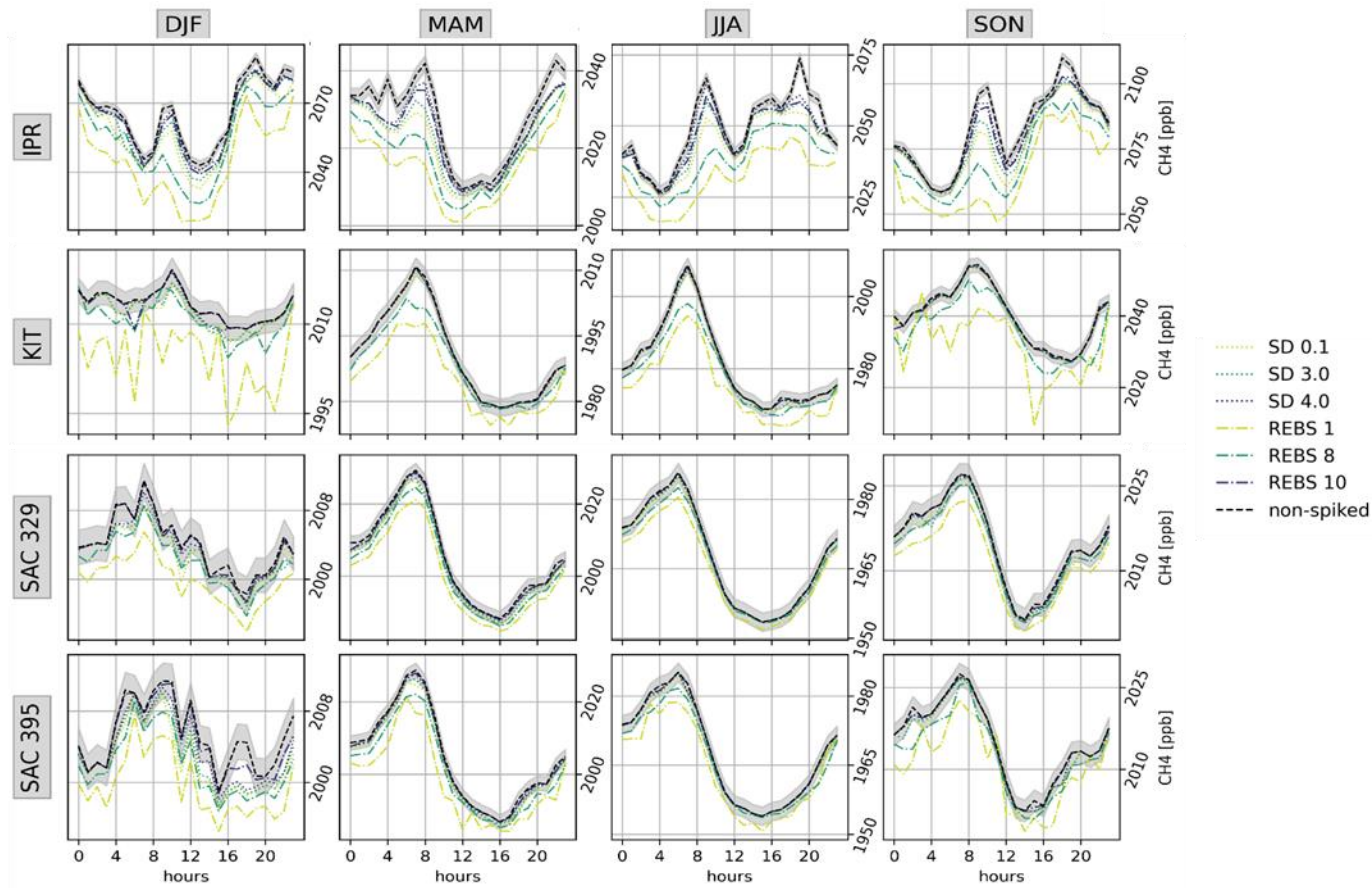

Figure 9: As for Figure 7 but for CH<sub>4</sub> at IPR, KIT, SAC 329 and SAC 395.
