# Supplementary material for: Identification of spikes in continuous ground-based in-situ time series of CO 2 , CH 4 and CO: an extended experiment within the European ICOS-Atmosphere Network
Source: Copernicus journal article supplement (doi:10.5194/amt-2023-130), 2023-07-03
Supplement: Supplementary file [file amt-2023-130-AC5-supplement.pdf]

**Table 4: List of specific method/setting currently adopted for each considered site. Sites are listed in alphabetical order according with their classifications (remote; not-remote).**

| Classification | Site | Species                                      | Method, setting                                             |
|----------------|------|----------------------------------------------|-------------------------------------------------------------|
| Remote         | CMN  | CO <sub>2</sub> ,<br>CH <sub>4</sub> ,<br>CO | SD, $\alpha = 1$<br>SD, $\alpha = 1$<br>SD, $\alpha = 3$    |
|                | JFJ  | CO <sub>2</sub> ,<br>CH <sub>4</sub> ,<br>CO | SD, $\alpha = 1$<br>SD, $\alpha = 1$<br>SD, $\alpha = 3$    |
|                | UTO  | CO <sub>2</sub> ,<br>CH <sub>4</sub> ,<br>CO | SD, $\alpha = 1$<br>SD, $\alpha = 1$<br>SD, $\alpha = 3$    |
|                | ZSF  | CO <sub>2</sub> ,<br>CH <sub>4</sub> ,<br>CO | SD, $\alpha = 1$<br>SD, $\alpha = 1$<br>SD, $\alpha = 3$    |
| Not-remote     | IPR  | CO <sub>2</sub> ,<br>CH <sub>4</sub> ,<br>CO | REBS, $\beta = 3$<br>REBS, $\beta = 3$<br>REBS, $\beta = 8$ |
|                | JUS  | CO <sub>2</sub> ,<br>CH <sub>4</sub> ,<br>CO | SD, $\alpha = 1$<br>SD, $\alpha = 1$<br>SD, $\alpha = 3$    |
|                | KIT  | CO <sub>2</sub> ,<br>CH <sub>4</sub> ,<br>CO | REBS, $\beta = 3$<br>REBS, $\beta = 3$<br>REBS, $\beta = 8$ |
|                | PUI  | CO <sub>2</sub> ,<br>CH <sub>4</sub>         | REBS, $\beta = 3$<br>REBS, $\beta = 3$                      |
|                | SAC  | CO <sub>2</sub> ,<br>CH <sub>4</sub> ,<br>CO | REBS, $\beta = 3$<br>REBS, $\beta = 3$<br>REBS, $\beta = 8$ |
