# Supplementary material for: Identification of spikes in continuous ground-based in-situ time series of CO 2 , CH 4 and CO: an extended experiment within the European ICOS-Atmosphere Network
Source: Copernicus journal article supplement (doi:10.5194/amt-2023-130), 2023-07-03
Supplement: Supplementary file [file amt-2023-130-AC6-supplement.pdf]

**Table 1: List of specific instruments working at the considered test sites during the study period. Sites are listed in alphabetical order according with their classifications (remote; not-remote). ICOS-labelled sites are identified by an asterisk.**

| Classification | Site (acronym, country)           | Sampling heights (above ground level) | Species                                                                                  | Instrument model #ICOS-ID; start date - end date                                                                                                                                         |
|----------------|-----------------------------------|---------------------------------------|------------------------------------------------------------------------------------------|------------------------------------------------------------------------------------------------------------------------------------------------------------------------------------------|
| Remote         | Monte Cimone * (CMN, Italy)       | 8 m                                   | CO <sub>2</sub> , CH <sub>4</sub> , CO                                                   | Picarro G2401 #590; 1/1/2019 - 31/12/2020                                                                                                                                                |
|                | Jungfrauoch * (JFJ, Switzerland)  | 5 m                                   | CO <sub>2</sub> , CH <sub>4</sub>                                                        | Picarro G2401 #225; 1/1/2019 - 15/10/2019<br>Picarro G2401 #226; 15/10/2019 - 26/11/2020<br>Picarro G2401 #529; 23/12/2020 - 31/12/2020                                                  |
|                |                                   |                                       | CO                                                                                       | Picarro G2401 #529; 23/12/2020 - 31/12/2020<br>Picarro G2401 #226; 15/10/2019 - 26/11/2020<br>Picarro G2401 #225; 1/1/2019 - 15/10/2019<br>LGR 913-0015 (EP) ; #412; 1/1/2019 - 7/1/2020 |
|                | Pic du Midi (PDM, France)         | 10 m                                  | CH <sub>4</sub>                                                                          | Picarro G2401 #222; 2014/11/1 - 2015/12/31                                                                                                                                               |
|                | Utö - Baltic sea * (UTO, Finland) | 57 m                                  | CO <sub>2</sub> , CH <sub>4</sub> , CO                                                   | Picarro G2401 #489; 1/1/2019 - 11/12/2020<br>Picarro G2401 #999; 11/12/2020 - 31/12/2020                                                                                                 |
|                | Zugspitze * (ZSF, Germany)        | 3 m                                   | CO <sub>2</sub> , CH <sub>4</sub>                                                        | Picarro G2301 #880; 13/1/2021 - 31/12/2021                                                                                                                                               |
| CO             |                                   |                                       | LGR 913-0015 (EP) ; #1073 131/1/2021 - 18/12/2021                                        |                                                                                                                                                                                          |
| Not-remote     | Ispira * (IPR, Italy)             | 40 m, 60 m, 100 m                     | CO <sub>2</sub> , CH <sub>4</sub> , CO                                                   | Picarro G2401 #619; 1/1/2019 - 31/12/2020                                                                                                                                                |
|                | Jussieu Paris (JUS, France)       | 30 m                                  | CO <sub>2</sub> , CH <sub>4</sub> , CO                                                   | Picarro G2401 #527; 1/1/2019 - 31/12/2020                                                                                                                                                |
|                | Karlsruhe * (KIT, Germany)        | 30 m, 60 m, 100 m, 200 m              | CO <sub>2</sub> , CH <sub>4</sub> , CO                                                   | Picarro G2401 #489 31/1/2019 - 28/3/2019<br>Picarro G2301 #458 28/3/2019 - 31/12/2020                                                                                                    |
|                |                                   |                                       | CO                                                                                       | Picarro G2401 #489 31/1/2019 - 28/3/2019<br>LGR 913-0015 (EP) #702; 5/8/2019 - 31/12/2020                                                                                                |
|                | Puijo * (PUI, Finland)            | 47 m, 84 m                            | CO <sub>2</sub> , CH <sub>4</sub>                                                        | Picarro G2301 #102; 1/1/2019 - 31/12/2020                                                                                                                                                |
|                | Saclay * (SAC, France)            | 15 m, 60 m, 100 m                     | CO <sub>2</sub> , CH <sub>4</sub> , CO                                                   | Picarro G2401 #329; 1/1/2019 - 31/12/2020<br>Picarro G2401 #395; 1/1/2019 - 31/12/2020                                                                                                   |
| CO             |                                   |                                       | Picarro G2401 #395; 1/1/2019 - 31/12/2020<br>Picarro G5310 #781; 23/01/2019 - 31/12/2020 |                                                                                                                                                                                          |
